# Supplementary material
Source: publisher figshare collection journal article supplement (https://future-science-group.figshare.com/ndownloader/files/34958913)
Supplement: Supplementary file 1 [file 34958913]

**Supplementary Information**

**Discovery of novel and potent InhA inhibitors by an *in silico* screening and pharmacokinetic prediction**

Chayanin Hanwarinroj1, Nareudon Phusi1, Bundit Kamsri 1, Pharit Kamsri2, Auradee Punkvang2, Sombat Ketrat3, Patchreenart Saparpakorn4, Supa Hannongbua4, Khomson Suttisintong5, Prasat Kittakoop6,7,8, James Spencer9, Adrian J. Mulholland10 and Pornpan Pungpo1*

1Department of Chemistry, Faculty of Science, Ubon Ratchathani University, Ubon Ratchathani, 34190, Thailand

2Division of Chemistry, Faculty of Science, Nakhon Phanom University, Nakhon Phanom, 48000, Thailand

3School of Information Science and Technology, Vidyasirimedhi Institute of Science and Technology, Rayong, 21210, Thailand

4Department of Chemistry, Faculty of Science, Kasetsart University, Bangkok, 10900 Thailand

5National Nanotechnology Center, NSTDA, 111 Thailand Science Park, Klong Luang, Pathum Thani, 12120, Thailand

6Chulabhorn Research Institute, 10210 Bangkok, Thailand

7Chulabhorn Graduate Institute, Chemical Biology Program, Chulabhorn Royal Academy, 10210 Bangkok, Thailand

8Center of Excellence on Environmental Health and Toxicology (EHT), CHE, Ministry of Education, 10300 Bangkok, Thailand

9School of Cellular and Molecular Medicine, Biomedical Sciences Building, University of Bristol, Bristol, BS8 1TD, United Kingdom

10Centre for Computational Chemistry, School of Chemistry, University of Bristol, Bristol, BS8 1TS, United Kingdom

| **Contents** | **Page** |
| --- | --- |
| **Figure S1.** RMSD plots of template molecule (a), **AG-690/13705356** (b), **AG-690/14006355** (c), **AP-845/40876827** (d), **AE-848/34504008** (e), **AP-845/40876825** (f), **AP-845/40876828** (g), **AP-845/40876832** (h) and **AS-871/41615872** (i) complexed with InhA | **3** |
| **Table S1.** The antimycobacterial prediction of hit compounds by antiBac-Pred | **4** |
| **Table S2.** The antimycobacterial prediction of hit compounds by mycoCSM | **4** |
| **Table S3.** Hydrogen bonding analysis of candidate compounds | **5** |

**
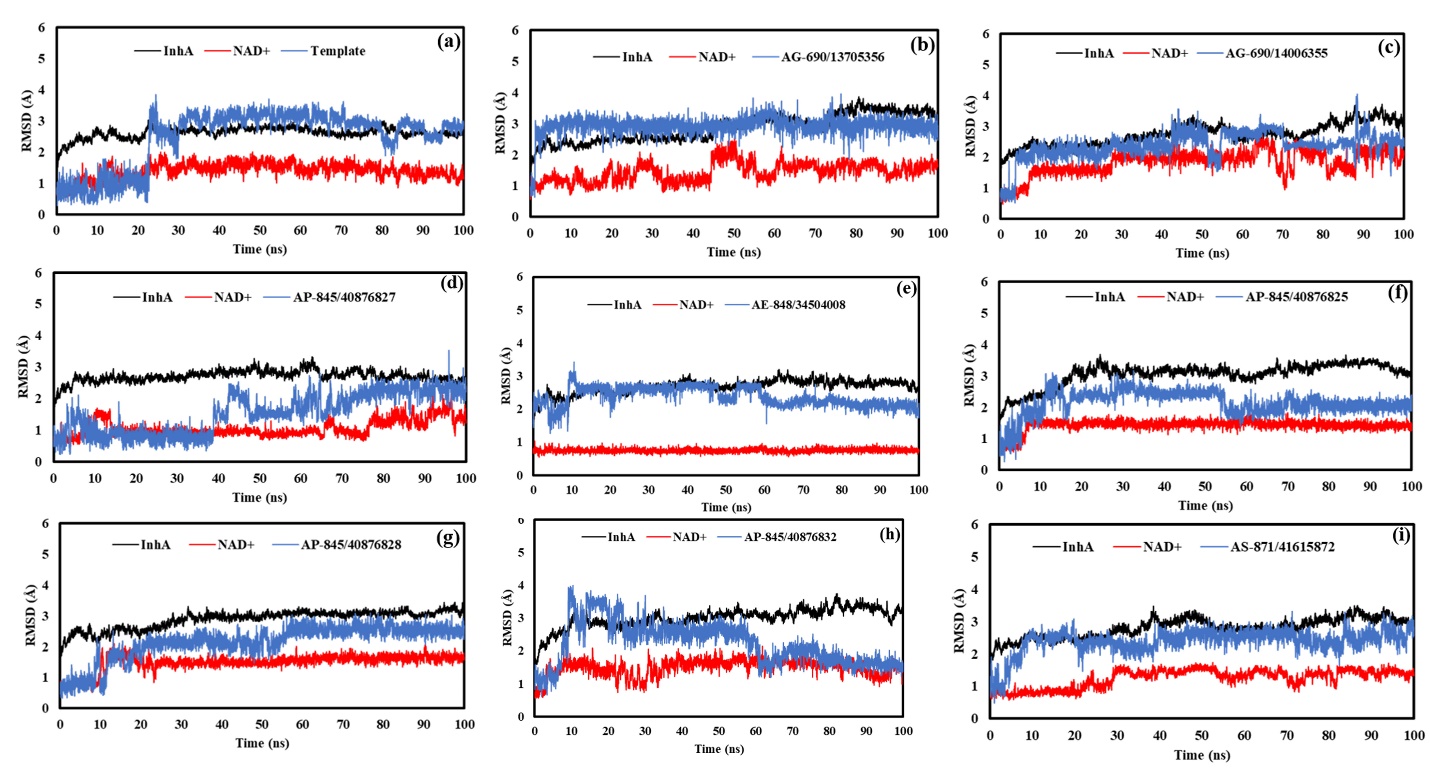
**

**Figure S1.** RMSD plots of template molecule (a), **AG-690/13705356** (b), **AG-690/14006355** (c), **AP-845/40876827** (d), **AE-848/34504008** (e), **AP-845/40876825** (f), **AP-845/40876828** (g), **AP-845/40876832** (h) and **AS-871/41615872** (i) complexed with InhA

**Table S1.** The antimycobacterial prediction of hit compounds by antiBac-Pred

| **Compound** | ***M. tuberculosis*** | ***M. tuberculosis* H37Rv** | ***M. avium*** | ***M. bovis BCG*** | ***M. kansasii*** | **Resistant *M. avium*** | **Resistant *M. tuberculosis* H37Rv** | ***M. bovis*** |
| --- | --- | --- | --- | --- | --- | --- | --- | --- |
| AP-124/43238118 (template) | none | 0.1 | none | none | none | none | none | none |
| AE-848/34504008 | 0.1 | 0.2 | none | none | none | none | none | none |
| AG-690/13705356 | none | 0.1 | 0.1 | 0.1 | 0.1 | 0.1 | 0.1 | none |
| AG-690/14006355 | none | none | none | none | none | none | none | none |
| AP-845/40876825 | none | 0.1 | none | none | none | none | none | none |
| AP-845/40876827 | none | none | none | none | none | none | none | none |
| AP-845/40876828 | none | none | none | none | none | none | none | none |
| AP-845/40876832 | none | none | 0.1 | none | none | none | none | none |
| AS-871/41615872 | none | none | none | none | none | none | none | 0.1 |

**Table S2.** The antimycobacterial prediction of hit compounds by mycoCSM

| **Compound** | ***M. avium*** | ***M. bovis*** | ***M. fortuitum*** | ***M. intracellulare*** | ***M. kansasii*** | ***M. phlei*** | ***M. smegmatis*** | ***M. tuberculosis*** |
| --- | --- | --- | --- | --- | --- | --- | --- | --- |
| AP-124/43238118 (template) | -4.8 | -6.2 | -4.2 | -4.2 | -4.4 | -4.4 | -4.2 | -4.9 |
| AE-848/34504008 | -3.8 | -6.0 | -4.1 | -4.2 | -4.3 | -4.4 | -4.1 | -5.1 |
| AS-871/41615872 | -4.3 | -5.2 | -4.0 | -4.3 | -4.0 | -4.3 | -4.2 | -4.9 |
| AP-845/40876827 | -4.6 | -6.2 | -4.2 | -4.3 | -4.8 | -4.1 | -4.8 | -4.9 |
| AP-845/40876828 | -4.6 | -6.2 | -4.1 | -4.3 | -4.2 | -4.2 | -4.8 | -4.7 |
| AP-845/40876832 | -5.0 | -5.1 | -4.1 | -4.1 | -4.5 | -4.2 | -4.3 | -4.8 |
| AG-690/13705356 | -4.1 | -6.3 | -4.1 | -4.3 | -3.7 | -3.8 | -4.7 | -5.4 |
| AG-690/14006355 | -4.2 | -3.5 | -4.1 | -4.1 | -4.1 | -4.3 | -4.3 | -4.4 |
| AP-845/40876825 | -4.7 | -5.2 | -4.3 | -4.2 | -4.6 | -4.5 | -4.0 | -4.9 |

**Table S3.** Hydrogen bonding analysis of candidate compounds

| **Compound** | **Acceptor** | **DonorH** | **Donor** | **%Occupation**  **(%)** | **Average distance (Å)** | **Average angle (o)** |
| --- | --- | --- | --- | --- | --- | --- |
| AP-124/43238118 (template) | NAD@O1N | LIG@H20 | LIG@O1 | 79.5 | 2.60 | 167.7 |
| NAD@O2A | LIG@H20 | LIG@O1 | 13.8 | 2.68 | 165.2 |
| AG-690/13705356 | LIG@O13 | Gln214@HE22 | Gln214@NE2 | 24.2 | 2.89 | 160.9 |
| AG-690/14006355 | Gln214@OE1 | LIG@H38 | LIG@O13 | 24.0 | 2.70 | 165.6 |
| AP-845/40876828 | NAD@O1A | LIG@H13 | LIG@O1 | 44.4 | 2.63 | 165.7 |
| AP-845/40876832 | LIG@N7 | Gln214@HE22 | Gln214@NE2 | 5.4 | 2.92 | 162.6 |
